# Supplementary material for: To boldly go where no microRNAs have gone before: spaceflight impact on risk for small-for-gestational-age infants
Source: PubMed Central journal article supplement — Commun Biol. 2024 Oct 5;7:1268. doi: 10.1038/s42003-024-06944-6 (PMC11455966; doi:10.1038/s42003-024-06944-6), 2024-10-05
Supplement: 42003_2024_6944_MOESM3_ESM.pdf [file 42003_2024_6944_MOESM3_ESM.pdf]

## Description Of Additional Supplementary File

**File name:** Supplementary Table 1.

**Description:** Data from the GSEA pathway analysis on blood samples from C57BL/6 mice 14 days post exposure to 50 cGy simplified GCR simulated irradiation

**File name:** Supplementary Table 2.

**Description:** Gene targets for all 13 miRNAs.

**File name:** Supplementary Table 3.

**Description:** Data from the GSEA pathway sex specific analysis on blood samples from Inspiration4 (I4) astronauts with the Hallmark, Reactome, and MitoPathway databases.

**File name:** Supplementary Table 4.

**Description:** Predicted small molecule drugs for SGA-associated spaceflight miRNA signature.
